# Supplementary material for: Socioeconomic Inequalities in Total and Site-Specific Cancer Incidence in Germany: A Population-Based Registry Study
Source: PubMed Central journal article supplement (PMC6167637; doi:10.3389/fonc.2018.00402), 2018-09-25
Supplement: Data_Sheet_1.pdf [file Data_Sheet_1.pdf]

## *Supplementary Material*

# **Socioeconomic inequalities in total and site-specific cancer incidence in Germany: a population-based registry study**

**Jens Hoebel\*, Lars E. Kroll, Julia Fiebig, Thomas Lampert, Alexander Katalinic, Benjamin Barnes, Klaus Kraywinkel**

\* **Correspondence:** Jens Hoebel (j.hoebel@rki.de)

### **Content:**

**SUPPLEMENTARY TABLE S1** – Age-standardized incidence rates among men and women by quintiles of district-level socioeconomic deprivation

**SUPPLEMENTARY TABLE S2** – Age-standardized incidence rates among men and women by quintiles of district-level socioeconomic deprivation

**SUPPLEMENTARY TABLE S3** – Absolute and relative inequalities in cancer incidence among men and women by district-level socioeconomic deprivation

**SUPPLEMENTARY TABLE S1** – Age-standardized incidence rates for cancer by sex

|                                                        | Men                 | Women               | Total               |
|--------------------------------------------------------|---------------------|---------------------|---------------------|
| <b>All cancers (C00–C97)<sup>a</sup></b>               |                     |                     |                     |
| SIR (95% CI)                                           | 677.6 (670.4–684.7) | 490.6 (484.9–496.3) | 575.4 (569.5–581.2) |
| <b>Upper respiratory tract (C00–C06, C09–C14, C32)</b> |                     |                     |                     |
| SIR (95% CI)                                           | 30.0 (29.3–30.7)    | 7.9 (7.7–8.2)       | 19.0 (18.6–19.4)    |
| <b>Esophagus (C15)</b>                                 |                     |                     |                     |
| SIR (95% CI)                                           | 13.2 (12.8–13.5)    | 3.0 (2.9–3.1)       | 8.1 (7.9–8.3)       |
| <b>Stomach (C16)</b>                                   |                     |                     |                     |
| SIR (95% CI)                                           | 26.1 (25.6–26.6)    | 13.7 (13.4–14.0)    | 19.9 (19.6–20.3)    |
| <b>Colorectum (C18–C20)</b>                            |                     |                     |                     |
| SIR (95% CI)                                           | 92.6 (91.3–93.9)    | 59.2 (58.3–60.1)    | 75.9 (74.9–76.9)    |
| <b>Liver (C22)</b>                                     |                     |                     |                     |
| SIR (95% CI)                                           | 16.1 (15.6–16.6)    | 5.2 (5.1–5.4)       | 10.7 (10.4–11.0)    |
| <b>Pancreas (C25)</b>                                  |                     |                     |                     |
| SIR (95% CI)                                           | 22.3 (21.9–22.7)    | 17.3 (17.0–17.5)    | 19.9 (19.7–20.2)    |
| <b>Lung (C33–C34)</b>                                  |                     |                     |                     |
| SIR (95% CI)                                           | 91.7 (89.7–93.6)    | 37.2 (35.9–38.5)    | 63.2 (61.7–64.8)    |
| <b>Malignant melanoma of skin (C43)</b>                |                     |                     |                     |
| SIR (95% CI)                                           | 27.6 (26.8–28.4)    | 24.2 (23.4–25.1)    | 25.3 (24.5–26.1)    |
| <b>Breast (C50)</b>                                    |                     |                     |                     |
| SIR (95% CI)                                           | -                   | 155.7 (153.5–158.0) | -                   |
| <b>Cervix uteri (C53)</b>                              |                     |                     |                     |
| SIR (95% CI)                                           | -                   | 11.5 (11.2–11.8)    | -                   |
| <b>Uterus (C54–C55)</b>                                |                     |                     |                     |
| SIR (95% CI)                                           | -                   | 24.2 (23.7–24.7)    | -                   |
| <b>Ovary (C56)</b>                                     |                     |                     |                     |
| SIR (95% CI)                                           | -                   | 16.9 (16.6–17.2)    | -                   |
| <b>Prostate (C61)</b>                                  |                     |                     |                     |
| SIR (95% CI)                                           | 172.4 (169.3–175.5) | -                   | -                   |
| <b>Testis (C62)</b>                                    |                     |                     |                     |
| SIR (95% CI)                                           | 10.7 (10.4–11.0)    | -                   | -                   |
| <b>Kidney (C64)</b>                                    |                     |                     |                     |
| SIR (95% CI)                                           | 25.7 (25.1–26.2)    | 12.6 (12.3–12.9)    | 19.2 (18.8–19.6)    |
| <b>Bladder and other urinary sites (C65–C68)</b>       |                     |                     |                     |
| SIR (95% CI)                                           | 34.9 (34.1–35.8)    | 10.4 (10.1–10.7)    | 22.5 (22.0–23.1)    |
| <b>Bladder (C67)</b>                                   |                     |                     |                     |
| SIR (95% CI)                                           | 30.6 (29.8–31.4)    | 8.4 (8.1–8.6)       | 19.4 (18.9–19.8)    |
| <b>Other urinary sites (C65, C66, C68)</b>             |                     |                     |                     |
| SIR (95% CI)                                           | 4.4 (4.2–4.6)       | 2.1 (2.0–2.2)       | 3.3 (3.1–3.4)       |
| <b>Bladder (C67, D09.0, D41.4)</b>                     |                     |                     |                     |
| SIR (95% CI)                                           | 59.1 (57.7–60.4)    | 14.8 (14.5–15.2)    | 36.7 (35.8–37.5)    |

**SUPPLEMENTARY TABLE S1 (continued)**

|                                                                              | Men              | Women            | Total            |
|------------------------------------------------------------------------------|------------------|------------------|------------------|
| <b>Bladder and other urinary sites (C65–C68, D09.0, D09.1, D41.4, D41.7)</b> |                  |                  |                  |
| SIR (95% CI)                                                                 | 64.5 (63.1–66.0) | 17.4 (16.9–17.8) | 40.6 (39.7–41.5) |
| <b>Central Nervous System (C70–C72)</b>                                      |                  |                  |                  |
| SIR (95% CI)                                                                 | 10.3 (10.1–10.6) | 7.2 (7.1–7.4)    | 8.7 (8.6–8.9)    |
| <b>Thyroid gland (C73)</b>                                                   |                  |                  |                  |
| SIR (95% CI)                                                                 | 4.8 (4.6–5.0)    | 10.5 (10.0–10.9) | 7.5 (7.3–7.8)    |
| <b>Lymphoid/hematopoietic neoplasms (C81–C96)</b>                            |                  |                  |                  |
| SIR (95% CI)                                                                 | 54.3 (53.3–55.3) | 36.2 (35.5–36.8) | 45.0 (44.3–45.8) |
| <b>Others</b>                                                                |                  |                  |                  |
| SIR (95% CI)                                                                 | 48.4 (47.4–49.3) | 40.6 (39.8–41.4) | 44.2 (43.5–45.0) |

<sup>a</sup> without C44 and C77–C79; CI, confidence interval; All rates are predictive margins (predicted cases per 100,000 residents) from multilevel Poisson regression models, weighted according to the 2013 European Standard Population.

**SUPPLEMENTARY TABLE S2** – Age-standardized incidence rates among men and women by quintiles of district-level socioeconomic deprivation

|                                                        | Quintiles of socioeconomic deprivation |                     |                     |                     |                                   |
|--------------------------------------------------------|----------------------------------------|---------------------|---------------------|---------------------|-----------------------------------|
|                                                        | 1 (least deprived)<br>SIR (95% CI)     | 2<br>SIR (95% CI)   | 3<br>SIR (95% CI)   | 4<br>SIR (95% CI)   | 5 (most deprived)<br>SIR (95% CI) |
| <b>All cancers (C00–C97)<sup>a</sup></b>               |                                        |                     |                     |                     |                                   |
| Total                                                  | 565.9 (555.9–575.9)                    | 569.7 (561.4–578.0) | 582.6 (574.5–590.7) | 579.8 (571.6–588.0) | 578.9 (569.9–587.8)               |
| Men                                                    | 648.7 (635.9–661.6)                    | 664.9 (653.8–676.1) | 686.8 (675.8–697.8) | 691.8 (680.8–702.8) | 695.9 (683.7–708.0)               |
| Women                                                  | 491.3 (480.7–501.8)                    | 488.5 (479.6–497.3) | 497.3 (488.6–505.9) | 489.2 (480.7–497.8) | 486.8 (477.5–496.1)               |
| <b>Upper respiratory tract (C00–C06, C09–C14, C32)</b> |                                        |                     |                     |                     |                                   |
| Total                                                  | 17.6 (16.8–18.4)                       | 17.9 (17.1–18.6)    | 18.4 (17.7–19.2)    | 20.1 (19.3–20.9)    | 20.9 (20.0–21.8)                  |
| Men                                                    | 27.3 (25.9–28.6)                       | 27.8 (26.5–29.1)    | 28.6 (27.3–29.9)    | 32.6 (31.2–34.0)    | 33.9 (32.3–35.4)                  |
| Women                                                  | 7.8 (7.3–8.4)                          | 7.8 (7.3–8.4)       | 8.0 (7.5–8.5)       | 7.6 (7.1–8.2)       | 8.3 (7.7–8.9)                     |
| <b>Esophagus (C15)</b>                                 |                                        |                     |                     |                     |                                   |
| Total                                                  | 7.5 (7.1–7.9)                          | 8.0 (7.6–8.4)       | 8.4 (8.0–8.9)       | 8.2 (7.8–8.6)       | 8.5 (8.1–8.9)                     |
| Men                                                    | 11.9 (11.3–12.6)                       | 12.9 (12.2–13.6)    | 13.6 (12.9–14.3)    | 13.3 (12.6–13.9)    | 14.2 (13.5–14.9)                  |
| Women                                                  | 3.1 (2.8–3.4)                          | 3.0 (2.7–3.2)       | 3.3 (3.0–3.5)       | 3.0 (2.7–3.3)       | 2.8 (2.5–3.0)                     |
| <b>Stomach (C16)</b>                                   |                                        |                     |                     |                     |                                   |
| Total                                                  | 18.2 (17.6–18.9)                       | 19.2 (18.6–19.9)    | 19.8 (19.2–20.5)    | 20.7 (20.0–21.3)    | 21.8 (21.1–22.5)                  |
| Men                                                    | 23.7 (22.8–24.7)                       | 24.5 (23.6–25.5)    | 25.9 (24.9–26.9)    | 27.4 (26.4–28.4)    | 29.0 (27.9–30.0)                  |
| Women                                                  | 12.6 (12.0–13.1)                       | 13.7 (13.1–14.3)    | 13.5 (13.0–14.1)    | 14.0 (13.5–14.6)    | 14.7 (14.1–15.3)                  |
| <b>Colorectum (C18–C20)</b>                            |                                        |                     |                     |                     |                                   |
| Total                                                  | 72.9 (71.0–74.9)                       | 75.6 (73.7–77.4)    | 77.7 (75.9–79.5)    | 76.6 (74.8–78.4)    | 76.8 (74.9–78.6)                  |
| Men                                                    | 88.1 (85.5–90.7)                       | 92.2 (89.6–94.8)    | 93.8 (91.3–96.4)    | 94.3 (91.8–96.8)    | 94.5 (91.9–97.1)                  |
| Women                                                  | 57.1 (55.3–59.0)                       | 58.7 (56.9–60.5)    | 61.8 (60.0–63.6)    | 59.4 (57.6–61.1)    | 58.9 (57.1–60.7)                  |
| <b>Liver (C22)</b>                                     |                                        |                     |                     |                     |                                   |
| Total                                                  | 10.8 (10.2–11.4)                       | 10.5 (9.9–11.0)     | 9.9 (9.4–10.4)      | 10.9 (10.4–11.5)    | 11.3 (10.7–11.9)                  |
| Men                                                    | 16.6 (15.5–17.7)                       | 15.6 (14.6–16.5)    | 14.9 (14.0–15.8)    | 16.4 (15.4–17.4)    | 16.9 (15.9–17.9)                  |
| Women                                                  | 5.0 (4.7–5.3)                          | 5.2 (4.9–5.6)       | 4.8 (4.5–5.2)       | 5.3 (5.0–5.7)       | 5.8 (5.4–6.1)                     |
| <b>Pancreas (C25)</b>                                  |                                        |                     |                     |                     |                                   |
| Total                                                  | 20.1 (19.6–20.7)                       | 19.4 (18.9–20.0)    | 19.4 (18.8–19.9)    | 19.9 (19.4–20.5)    | 20.8 (20.2–21.3)                  |
| Men                                                    | 22.5 (21.6–23.3)                       | 21.2 (20.4–22.0)    | 21.6 (20.8–22.4)    | 22.5 (21.7–23.3)    | 24.0 (23.1–24.8)                  |
| Women                                                  | 17.7 (17.2–18.3)                       | 17.4 (16.8–18.0)    | 16.8 (16.3–17.4)    | 17.1 (16.5–17.6)    | 17.4 (16.8–18.0)                  |
| <b>Lung (C33–C34)</b>                                  |                                        |                     |                     |                     |                                   |
| Total                                                  | 56.4 (53.9–59.0)                       | 59.6 (57.4–61.9)    | 64.5 (62.2–66.8)    | 67.7 (65.3–70.1)    | 68.0 (65.4–70.7)                  |
| Men                                                    | 77.4 (74.1–80.8)                       | 85.1 (81.9–88.2)    | 93.1 (89.8–96.4)    | 99.9 (96.4–103.3)   | 103.1 (99.2–106.9)                |
| Women                                                  | 35.5 (33.1–37.9)                       | 35.5 (33.5–37.6)    | 38.8 (36.7–41.0)    | 38.6 (36.4–40.7)    | 37.7 (35.4–40.0)                  |
| <b>Malignant melanoma of skin (C43)</b>                |                                        |                     |                     |                     |                                   |
| Total                                                  | 28.1 (26.5–29.7)                       | 26.7 (25.3–28.0)    | 26.6 (25.3–27.9)    | 23.2 (22.1–24.4)    | 21.8 (20.6–23.0)                  |
| Men                                                    | 31.6 (29.8–33.4)                       | 30.0 (28.4–31.6)    | 28.4 (26.9–29.9)    | 25.0 (23.6–26.3)    | 22.9 (21.6–24.2)                  |
| Women                                                  | 26.8 (25.0–28.7)                       | 24.7 (23.2–26.2)    | 26.1 (24.6–27.6)    | 22.4 (21.0–23.7)    | 21.1 (19.6–22.5)                  |
| <b>Breast (C50)</b>                                    |                                        |                     |                     |                     |                                   |
| Total                                                  | -                                      | -                   | -                   | -                   | -                                 |
| Men                                                    | -                                      | -                   | -                   | -                   | -                                 |
| Women                                                  | 159.1 (154.6–163.7)                    | 156.7 (152.7–160.6) | 158.5 (154.6–162.3) | 152.6 (148.9–156.3) | 151.7 (147.8–155.7)               |

**SUPPLEMENTARY TABLE S2 (continued)**

|                                                  | Quintiles of socioeconomic deprivation |                     |                     |                     |                                   |
|--------------------------------------------------|----------------------------------------|---------------------|---------------------|---------------------|-----------------------------------|
|                                                  | 1 (least deprived)<br>SIR (95% CI)     | 2<br>SIR (95% CI)   | 3<br>SIR (95% CI)   | 4<br>SIR (95% CI)   | 5 (most deprived)<br>SIR (95% CI) |
| <b>Cervix uteri (C53)</b>                        |                                        |                     |                     |                     |                                   |
| Total                                            | -                                      | -                   | -                   | -                   | -                                 |
| Men                                              | -                                      | -                   | -                   | -                   | -                                 |
| Women                                            | 10.9 (10.3–11.5)                       | 10.7 (10.1–11.3)    | 11.3 (10.7–11.9)    | 12.5 (11.8–13.1)    | 12.1 (11.5–12.8)                  |
| <b>Uterus (C54–C55)</b>                          |                                        |                     |                     |                     |                                   |
| Total                                            | -                                      | -                   | -                   | -                   | -                                 |
| Men                                              | -                                      | -                   | -                   | -                   | -                                 |
| Women                                            | 23.9 (23.0–24.9)                       | 24.4 (23.4–25.4)    | 24.2 (23.3–25.2)    | 24.4 (23.5–25.4)    | 24.0 (23.1–25.0)                  |
| <b>Ovary (C56)</b>                               |                                        |                     |                     |                     |                                   |
| Total                                            | -                                      | -                   | -                   | -                   | -                                 |
| Men                                              | -                                      | -                   | -                   | -                   | -                                 |
| Women                                            | 17.1 (16.4–17.8)                       | 17.3 (16.6–18.0)    | 17.6 (16.9–18.3)    | 16.6 (15.9–17.3)    | 15.9 (15.2–16.5)                  |
| <b>Prostate (C61)</b>                            |                                        |                     |                     |                     |                                   |
| Total                                            | -                                      | -                   | -                   | -                   | -                                 |
| Men                                              | 168.8 (163.0–174.7)                    | 170.8 (165.6–175.9) | 178.8 (173.6–183.9) | 170.6 (165.8–175.5) | 173.1 (167.7–178.5)               |
| Women                                            | -                                      | -                   | -                   | -                   | -                                 |
| <b>Testis (C62)</b>                              |                                        |                     |                     |                     |                                   |
| Total                                            | -                                      | -                   | -                   | -                   | -                                 |
| Men                                              | 10.1 (9.5–10.7)                        | 10.6 (10.0–11.3)    | 11.0 (10.4–11.6)    | 11.0 (10.4–11.6)    | 10.6 (9.9–11.2)                   |
| Women                                            | -                                      | -                   | -                   | -                   | -                                 |
| <b>Kidney (C64)</b>                              |                                        |                     |                     |                     |                                   |
| Total                                            | 17.4 (16.7–18.2)                       | 18.6 (17.8–19.3)    | 18.6 (17.9–19.4)    | 20.4 (19.6–21.1)    | 21.1 (20.3–22.0)                  |
| Men                                              | 23.3 (22.2–24.5)                       | 24.8 (23.6–26.0)    | 24.6 (23.5–25.7)    | 27.2 (26.0–28.4)    | 28.3 (27.1–29.6)                  |
| Women                                            | 11.1 (10.5–11.7)                       | 12.1 (11.4–12.7)    | 12.1 (11.5–12.8)    | 13.2 (12.6–13.9)    | 14.3 (13.6–15.0)                  |
| <b>Bladder and other urinary sites (C65–C68)</b> |                                        |                     |                     |                     |                                   |
| Total                                            | 20.6 (19.6–21.6)                       | 21.8 (20.8–22.8)    | 22.7 (21.7–23.7)    | 23.5 (22.5–24.5)    | 24.2 (23.1–25.3)                  |
| Men                                              | 31.8 (30.1–33.4)                       | 33.6 (31.9–35.2)    | 35.2 (33.6–36.9)    | 36.5 (34.8–38.2)    | 37.7 (35.9–39.4)                  |
| Women                                            | 9.6 (9.0–10.1)                         | 10.2 (9.5–10.8)     | 10.6 (10.0–11.2)    | 10.6 (10.0–11.2)    | 11.2 (10.6–11.9)                  |
| <b>Bladder (C67)</b>                             |                                        |                     |                     |                     |                                   |
| Total                                            | 17.6 (16.7–18.5)                       | 18.6 (17.7–19.5)    | 19.4 (18.6–20.3)    | 20.2 (19.3–21.1)    | 20.9 (20.0–21.9)                  |
| Men                                              | 27.7 (26.2–29.2)                       | 29.4 (27.9–30.9)    | 30.9 (29.4–32.4)    | 31.9 (30.4–33.5)    | 33.2 (31.5–34.8)                  |
| Women                                            | 7.7 (7.2–8.2)                          | 8.0 (7.5–8.6)       | 8.4 (7.9–8.9)       | 8.6 (8.1–9.1)       | 9.1 (8.6–9.7)                     |
| <b>Other urinary sites (C65, C66, C68)</b>       |                                        |                     |                     |                     |                                   |
| Total                                            | 3.0 (2.8–3.3)                          | 3.2 (3.0–3.5)       | 3.4 (3.1–3.6)       | 3.3 (3.0–3.5)       | 3.3 (3.1–3.6)                     |
| Men                                              | 4.3 (3.8–4.7)                          | 4.4 (4.0–4.8)       | 4.5 (4.1–4.9)       | 4.6 (4.2–5.0)       | 4.5 (4.1–4.9)                     |
| Women                                            | 1.9 (1.7–2.1)                          | 2.2 (1.9–2.4)       | 2.3 (2.1–2.5)       | 2.0 (1.8–2.2)       | 2.2 (1.9–2.4)                     |
| <b>Bladder (C67, D09.0, D41.4)</b>               |                                        |                     |                     |                     |                                   |
| Total                                            | 33.4 (31.9–34.9)                       | 35.9 (34.5–37.4)    | 37.9 (36.4–39.4)    | 38.0 (36.6–39.5)    | 38.1 (36.6–39.7)                  |
| Men                                              | 53.4 (50.9–55.9)                       | 57.5 (55.1–60.0)    | 61.3 (58.8–63.8)    | 61.8 (59.3–64.2)    | 61.5 (58.9–64.1)                  |
| Women                                            | 13.7 (12.9–14.5)                       | 14.5 (13.7–15.3)    | 15.4 (14.6–16.2)    | 15.0 (14.2–15.8)    | 15.6 (14.8–16.4)                  |

**SUPPLEMENTARY TABLE S2 (continued)**

|                                                                              | Quintiles of socioeconomic deprivation |                   |                   |                   |                                   |
|------------------------------------------------------------------------------|----------------------------------------|-------------------|-------------------|-------------------|-----------------------------------|
|                                                                              | 1 (least deprived)<br>SIR (95% CI)     | 2<br>SIR (95% CI) | 3<br>SIR (95% CI) | 4<br>SIR (95% CI) | 5 (most deprived)<br>SIR (95% CI) |
| <b>Bladder and other urinary sites (C65–C68, D09.0, D09.1, D41.4, D41.7)</b> |                                        |                   |                   |                   |                                   |
| Total                                                                        | 37.2 (35.5–38.8)                       | 39.9 (38.3–41.5)  | 42.0 (40.4–43.6)  | 41.9 (40.4–43.5)  | 42.2 (40.5–43.9)                  |
| Men                                                                          | 58.5 (55.8–61.3)                       | 62.9 (60.3–65.5)  | 66.7 (64.1–69.4)  | 67.2 (64.6–69.8)  | 67.3 (64.5–70.1)                  |
| Women                                                                        | 16.0 (15.1–16.9)                       | 17.0 (16.1–17.9)  | 18.2 (17.2–19.1)  | 17.5 (16.6–18.3)  | 18.1 (17.2–19.1)                  |
| <b>Central Nervous System (C70–C72)</b>                                      |                                        |                   |                   |                   |                                   |
| Total                                                                        | 8.7 (8.4–9.1)                          | 8.6 (8.2–9.0)     | 8.7 (8.4–9.1)     | 8.8 (8.5–9.2)     | 8.8 (8.5–9.2)                     |
| Men                                                                          | 10.4 (9.9–10.8)                        | 10.1 (9.6–10.6)   | 10.4 (9.9–10.9)   | 10.5 (10.0–11.0)  | 10.3 (9.8–10.8)                   |
| Women                                                                        | 7.2 (6.8–7.6)                          | 7.3 (6.9–7.7)     | 7.2 (6.8–7.6)     | 7.2 (6.8–7.6)     | 7.4 (7.0–7.8)                     |
| <b>Thyroid gland (C73)</b>                                                   |                                        |                   |                   |                   |                                   |
| Total                                                                        | 9.0 (8.4–9.6)                          | 8.1 (7.5–8.6)     | 7.8 (7.3–8.3)     | 6.1 (5.7–6.6)     | 6.6 (6.1–7.1)                     |
| Men                                                                          | 6.0 (5.5–6.5)                          | 5.0 (4.5–5.4)     | 5.1 (4.7–5.5)     | 4.0 (3.6–4.3)     | 3.8 (3.5–4.2)                     |
| Women                                                                        | 12.4 (11.4–13.4)                       | 11.4 (10.6–12.3)  | 10.5 (9.7–11.3)   | 8.4 (7.8–9.1)     | 9.5 (8.7–10.2)                    |
| <b>Lymphoid/hematopoietic neoplasms (C81–C96)</b>                            |                                        |                   |                   |                   |                                   |
| Total                                                                        | 42.5 (41.0–44.0)                       | 44.9 (43.5–46.3)  | 45.4 (44.0–46.8)  | 45.8 (44.5–47.2)  | 46.6 (45.1–48.1)                  |
| Men                                                                          | 51.3 (49.3–53.3)                       | 54.4 (52.4–56.4)  | 54.3 (52.4–56.2)  | 55.3 (53.4–57.3)  | 56.3 (54.3–58.4)                  |
| Women                                                                        | 33.7 (32.4–35.0)                       | 35.9 (34.6–37.3)  | 36.5 (35.2–37.8)  | 37.0 (35.7–38.3)  | 37.6 (36.2–38.9)                  |
| <b>Other cancers</b>                                                         |                                        |                   |                   |                   |                                   |
| Total                                                                        | 42.2 (40.7–43.7)                       | 43.4 (42.0–44.8)  | 44.6 (43.2–46.0)  | 45.4 (44.0–46.8)  | 45.6 (44.1–47.1)                  |
| Men                                                                          | 46.1 (44.3–48.0)                       | 47.4 (45.6–49.2)  | 48.8 (47.0–50.6)  | 49.5 (47.7–51.3)  | 50.1 (48.2–51.9)                  |
| Women                                                                        | 38.6 (37.0–40.2)                       | 39.8 (38.3–41.4)  | 41.1 (39.5–42.7)  | 41.4 (39.8–42.9)  | 42.1 (40.5–43.7)                  |

<sup>a</sup> without C44 and C77–C79; CI, confidence interval; All rates are predictive margins (predicted cases per 100,000 residents) from multilevel Poisson regression models, weighted according to the 2013 European Standard Population.

**SUPPLEMENTARY TABLE S3** – Absolute and relative inequalities in cancer incidence among men and women by district-level socioeconomic deprivation

|                                                        | Simple measures  |                  |         | Summary indices   |                  |         |
|--------------------------------------------------------|------------------|------------------|---------|-------------------|------------------|---------|
|                                                        | SRD (95% CI)     | SRR (95% CI)     | p-value | SII (95% CI)      | RII (95% CI)     | p-value |
| <b>All cancers (C00–C97)<sup>a</sup></b>               |                  |                  |         |                   |                  |         |
| Total                                                  | 12.9 (0.0–25.9)  | 1.02 (1.00–1.05) | 0.051   | 21.0 (2.1–39.8)   | 1.04 (1.00–1.07) | 0.029   |
| Men                                                    | 47.1 (29.7–64.6) | 1.07 (1.05–1.10) | <0.001  | 71.3 (47.8–94.9)  | 1.11 (1.07–1.15) | <0.001  |
| Women                                                  | -4.5 (-18.3–9.4) | 0.99 (0.96–1.02) | 0.526   | -7.5 (-26.4–11.5) | 0.98 (0.95–1.02) | 0.440   |
| <b>Upper respiratory tract (C00–C06, C09–C14, C32)</b> |                  |                  |         |                   |                  |         |
| Total                                                  | 3.3 (2.1–4.5)    | 1.19 (1.12–1.27) | <0.001  | 5.0 (3.6–6.4)     | 1.30 (1.21–1.40) | <0.001  |
| Men                                                    | 6.6 (4.5–8.6)    | 1.24 (1.16–1.33) | <0.001  | 9.8 (7.3–12.2)    | 1.38 (1.28–1.50) | <0.001  |
| Women                                                  | 0.5 (-0.3–1.3)   | 1.06 (0.96–1.17) | 0.246   | 0.4 (-0.5–1.3)    | 1.05 (0.94–1.17) | 0.403   |
| <b>Esophagus (C15)</b>                                 |                  |                  |         |                   |                  |         |
| Total                                                  | 1.0 (0.4–1.5)    | 1.13 (1.05–1.21) | 0.001   | 1.1 (0.4–1.7)     | 1.14 (1.05–1.24) | 0.001   |
| Men                                                    | 2.3 (1.3–3.2)    | 1.19 (1.11–1.28) | <0.001  | 2.5 (1.4–3.6)     | 1.21 (1.11–1.31) | <0.001  |
| Women                                                  | -0.3 (-0.7–0.1)  | 0.90 (0.79–1.02) | 0.106   | -0.3 (-0.8–0.1)   | 0.89 (0.77–1.04) | 0.141   |
| <b>Stomach (C16)</b>                                   |                  |                  |         |                   |                  |         |
| Total                                                  | 3.6 (2.6–4.5)    | 1.20 (1.14–1.25) | <0.001  | 4.4 (3.3–5.4)     | 1.25 (1.18–1.31) | <0.001  |
| Men                                                    | 5.2 (3.8–6.6)    | 1.22 (1.16–1.29) | <0.001  | 6.7 (5.1–8.2)     | 1.29 (1.22–1.37) | <0.001  |
| Women                                                  | 2.2 (1.3–3.0)    | 1.17 (1.10–1.24) | <0.001  | 2.4 (1.5–3.3)     | 1.19 (1.12–1.27) | <0.001  |
| <b>Colorectum (C18–C20)</b>                            |                  |                  |         |                   |                  |         |
| Total                                                  | 3.8 (1.1–6.5)    | 1.05 (1.01–1.09) | 0.006   | 5.1 (1.8–8.5)     | 1.07 (1.02–1.12) | 0.003   |
| Men                                                    | 6.4 (2.8–10.1)   | 1.07 (1.03–1.12) | 0.001   | 8.0 (3.6–12.4)    | 1.09 (1.04–1.14) | <0.001  |
| Women                                                  | 1.7 (-0.9–4.3)   | 1.03 (0.99–1.08) | 0.189   | 2.5 (-0.6–5.7)    | 1.04 (0.99–1.10) | 0.115   |
| <b>Liver (C22)</b>                                     |                  |                  |         |                   |                  |         |
| Total                                                  | 0.5 (-0.3–1.3)   | 1.05 (0.97–1.13) | 0.249   | 0.6 (-0.3–1.6)    | 1.06 (0.97–1.16) | 0.190   |
| Men                                                    | 0.3 (-1.2–1.7)   | 1.02 (0.93–1.11) | 0.714   | 0.4 (-1.3–2.1)    | 1.03 (0.92–1.14) | 0.632   |
| Women                                                  | 0.8 (0.3–1.3)    | 1.16 (1.06–1.27) | 0.001   | 0.8 (0.3–1.4)     | 1.17 (1.06–1.29) | 0.003   |
| <b>Pancreas (C25)</b>                                  |                  |                  |         |                   |                  |         |
| Total                                                  | 0.6 (-0.2–1.4)   | 1.03 (0.99–1.07) | 0.121   | 0.9 (-0.1–1.8)    | 1.04 (1.00–1.09) | 0.067   |
| Men                                                    | 1.5 (0.3–2.7)    | 1.07 (1.01–1.12) | 0.015   | 1.9 (0.6–3.3)     | 1.09 (1.03–1.16) | 0.005   |
| Women                                                  | -0.3 (-1.1–0.5)  | 0.98 (0.94–1.03) | 0.477   | -0.4 (-1.3–0.5)   | 0.98 (0.93–1.03) | 0.379   |
| <b>Lung (C33–C34)</b>                                  |                  |                  |         |                   |                  |         |
| Total                                                  | 11.6 (8.0–15.2)  | 1.21 (1.14–1.28) | <0.001  | 17.8 (12.7–22.8)  | 1.32 (1.22–1.43) | <0.001  |
| Men                                                    | 25.6 (20.5–30.7) | 1.33 (1.26–1.41) | <0.001  | 37.1 (30.5–43.7)  | 1.50 (1.40–1.61) | <0.001  |
| Women                                                  | 2.2 (-1.0–5.5)   | 1.06 (0.97–1.16) | 0.183   | 2.7 (-1.7–7.0)    | 1.07 (0.96–1.21) | 0.232   |
| <b>Malignant melanoma of skin (C43)</b>                |                  |                  |         |                   |                  |         |
| Total                                                  | -6.3 (-8.3–4.3)  | 0.78 (0.72–0.84) | <0.001  | -10.0 (-12.6–7.3) | 0.67 (0.61–0.75) | <0.001  |
| Men                                                    | -8.7 (-10.9–6.5) | 0.72 (0.67–0.79) | <0.001  | -12.3 (-15.0–9.5) | 0.64 (0.58–0.71) | <0.001  |
| Women                                                  | -5.8 (-8.1–3.5)  | 0.78 (0.71–0.86) | <0.001  | -8.3 (-11.3–5.4)  | 0.71 (0.63–0.80) | <0.001  |
| <b>Breast (C50)</b>                                    |                  |                  |         |                   |                  |         |
| Total                                                  | -                | -                | -       | -                 | -                | -       |
| Men                                                    | -                | -                | -       | -                 | -                | -       |
| Women                                                  | -7.4 (-13.4–1.4) | 0.95 (0.92–0.99) | 0.016   | -12.0 (-19.6–4.4) | 0.93 (0.88–0.97) | 0.002   |

**SUPPLEMENTARY TABLE S3 (continued)**

|                                                  | Simple measures |                  |         | Summary indices |                  |         |
|--------------------------------------------------|-----------------|------------------|---------|-----------------|------------------|---------|
|                                                  | SRD (95% CI)    | SRR (95% CI)     | p-value | SII (95% CI)    | RII (95% CI)     | p-value |
| <b>Cervix uteri (C53)</b>                        |                 |                  |         |                 |                  |         |
| Total                                            | -               | -                |         | -               | -                |         |
| Men                                              | -               | -                |         | -               | -                |         |
| Women                                            | 1.3 (0.4–2.2)   | 1.12 (1.03–1.21) | 0.005   | 2.0 (1.0–3.0)   | 1.19 (1.09–1.30) | <0.001  |
| <b>Uterus (C54–C55)</b>                          |                 |                  |         |                 |                  |         |
| Total                                            | -               | -                |         | -               | -                |         |
| Men                                              | -               | -                |         | -               | -                |         |
| Women                                            | 0.1 (-1.3–1.5)  | 1.00 (0.95–1.06) | 0.881   | 0.3 (-1.3–1.8)  | 1.01 (0.95–1.08) | 0.737   |
| <b>Ovary (C56)</b>                               |                 |                  |         |                 |                  |         |
| Total                                            | -               | -                |         | -               | -                |         |
| Men                                              | -               | -                |         | -               | -                |         |
| Women                                            | -1.2 (-2.2–0.2) | 0.93 (0.87–0.99) | 0.016   | -1.7 (-2.9–0.6) | 0.90 (0.84–0.97) | 0.003   |
| <b>Prostate (C61)</b>                            |                 |                  |         |                 |                  |         |
| Total                                            | -               | -                |         | -               | -                |         |
| Men                                              | 4.3 (-3.6–12.2) | 1.03 (0.98–1.07) | 0.286   | 2.6 (-7.7–12.9) | 1.02 (0.96–1.08) | 0.623   |
| Women                                            | -               | -                |         | -               | -                |         |
| <b>Testis (C62)</b>                              |                 |                  |         |                 |                  |         |
| Total                                            | -               | -                |         | -               | -                |         |
| Men                                              | 0.4 (-0.4–1.3)  | 1.04 (0.96–1.13) | 0.325   | 0.7 (-0.3–1.7)  | 1.07 (0.97–1.18) | 0.167   |
| Women                                            | -               | -                |         | -               | -                |         |
| <b>Kidney (C64)</b>                              |                 |                  |         |                 |                  |         |
| Total                                            | 3.7 (2.6–4.8)   | 1.21 (1.14–1.29) | <0.001  | 5.1 (3.7–6.4)   | 1.30 (1.22–1.40) | <0.001  |
| Men                                              | 5.0 (3.3–6.6)   | 1.21 (1.14–1.29) | <0.001  | 6.3 (4.3–8.3)   | 1.28 (1.18–1.38) | <0.001  |
| Women                                            | 3.2 (2.2–4.1)   | 1.28 (1.19–1.38) | <0.001  | 4.1 (3.1–5.2)   | 1.39 (1.28–1.51) | <0.001  |
| <b>Bladder and other urinary sites (C65–C68)</b> |                 |                  |         |                 |                  |         |
| Total                                            | 3.6 (2.1–5.1)   | 1.18 (1.10–1.26) | <0.001  | 4.9 (3.1–6.7)   | 1.24 (1.15–1.34) | <0.001  |
| Men                                              | 5.9 (3.5–8.3)   | 1.19 (1.10–1.27) | <0.001  | 7.9 (5.0–10.8)  | 1.25 (1.15–1.36) | <0.001  |
| Women                                            | 1.7 (0.8–2.6)   | 1.18 (1.08–1.28) | <0.001  | 1.8 (0.8–2.8)   | 1.19 (1.08–1.31) | <0.001  |
| <b>Bladder (C67)</b>                             |                 |                  |         |                 |                  |         |
| Total                                            | 3.3 (2.0–4.6)   | 1.19 (1.11–1.27) | <0.001  | 4.5 (2.9–6.1)   | 1.26 (1.16–1.37) | <0.001  |
| Men                                              | 5.5 (3.3–7.7)   | 1.20 (1.11–1.29) | <0.001  | 7.4 (4.7–10.0)  | 1.27 (1.17–1.39) | <0.001  |
| Women                                            | 1.4 (0.6–2.2)   | 1.18 (1.08–1.29) | <0.001  | 1.6 (0.7–2.4)   | 1.21 (1.09–1.34) | <0.001  |
| <b>Other urinary sites (C65, C66, C68)</b>       |                 |                  |         |                 |                  |         |
| Total                                            | 0.3 (-0.1–0.6)  | 1.09 (0.98–1.22) | 0.111   | 0.3 (-0.1–0.7)  | 1.09 (0.96–1.23) | 0.183   |
| Men                                              | 0.2 (-0.3–0.8)  | 1.06 (0.93–1.21) | 0.406   | 0.3 (-0.4–0.9)  | 1.06 (0.92–1.23) | 0.414   |
| Women                                            | 0.3 (0.0–0.5)   | 1.14 (0.99–1.31) | 0.074   | 0.2 (-0.1–0.5)  | 1.10 (0.94–1.28) | 0.229   |
| <b>Bladder (C67, D09.0, D41.4)</b>               |                 |                  |         |                 |                  |         |
| Total                                            | 4.7 (2.5–6.9)   | 1.14 (1.07–1.21) | <0.001  | 6.5 (3.7–9.3)   | 1.19 (1.11–1.29) | <0.001  |
| Men                                              | 8.1 (4.5–11.7)  | 1.15 (1.08–1.23) | <0.001  | 11.2 (6.6–15.8) | 1.21 (1.12–1.31) | <0.001  |
| Women                                            | 1.9 (0.7–3.1)   | 1.14 (1.05–1.23) | 0.001   | 2.1 (0.7–3.4)   | 1.15 (1.05–1.26) | 0.003   |



**SUPPLEMENTARY TABLE S3 (continued)**

|                                                                              | Simple measures |                  |         | Summary indices |                  |         |
|------------------------------------------------------------------------------|-----------------|------------------|---------|-----------------|------------------|---------|
|                                                                              | SRD (95% CI)    | SRR (95% CI)     | p-value | SII (95% CI)    | RII (95% CI)     | p-value |
| <b>Bladder and other urinary sites (C65–C68, D09.0, D09.1, D41.4, D41.7)</b> |                 |                  |         |                 |                  |         |
| Total                                                                        | 5.1 (2.7–7.4)   | 1.14 (1.07–1.21) | <0.001  | 6.8 (3.7–9.9)   | 1.18 (1.10–1.27) | <0.001  |
| Men                                                                          | 8.8 (4.9–12.7)  | 1.15 (1.08–1.22) | <0.001  | 11.8 (6.8–16.7) | 1.20 (1.11–1.30) | <0.001  |
| Women                                                                        | 2.1 (0.8–3.4)   | 1.13 (1.05–1.22) | 0.001   | 2.3 (0.8–3.8)   | 1.14 (1.05–1.25) | 0.003   |
| <b>Central Nervous System (C70–C72)</b>                                      |                 |                  |         |                 |                  |         |
| Total                                                                        | 0.1 (-0.4–0.6)  | 1.01 (0.96–1.07) | 0.648   | 0.1 (-0.5–0.6)  | 1.01 (0.94–1.07) | 0.846   |
| Men                                                                          | -0.1 (-0.8–0.6) | 0.99 (0.93–1.06) | 0.817   | -0.1 (-0.8–0.7) | 0.99 (0.92–1.07) | 0.848   |
| Women                                                                        | 0.2 (-0.3–0.8)  | 1.03 (0.96–1.11) | 0.437   | 0.1 (-0.5–0.7)  | 1.01 (0.93–1.10) | 0.781   |
| <b>Thyroid gland (C73)</b>                                                   |                 |                  |         |                 |                  |         |
| Total                                                                        | -2.4 (-3.2–1.6) | 0.73 (0.66–0.81) | <0.001  | -3.9 (-4.8–2.9) | 0.60 (0.53–0.68) | <0.001  |
| Men                                                                          | -2.2 (-2.8–1.6) | 0.64 (0.57–0.72) | <0.001  | -2.8 (-3.4–2.1) | 0.56 (0.49–0.64) | <0.001  |
| Women                                                                        | -3.0 (-4.2–1.7) | 0.76 (0.68–0.85) | <0.001  | -5.1 (-6.5–3.6) | 0.62 (0.54–0.70) | <0.001  |
| <b>Lymphoid/hematopoietic neoplasms (C81–C96)</b>                            |                 |                  |         |                 |                  |         |
| Total                                                                        | 4.2 (2.0–6.3)   | 1.10 (1.05–1.15) | <0.001  | 4.7 (2.1–7.3)   | 1.11 (1.05–1.18) | <0.001  |
| Men                                                                          | 5.0 (2.2–7.9)   | 1.10 (1.04–1.16) | 0.001   | 5.5 (2.1–9.0)   | 1.11 (1.04–1.18) | 0.002   |
| Women                                                                        | 3.8 (2.0–5.7)   | 1.11 (1.06–1.17) | <0.001  | 4.2 (2.0–6.5)   | 1.12 (1.06–1.20) | <0.001  |
| <b>Other cancers</b>                                                         |                 |                  |         |                 |                  |         |
| Total                                                                        | 3.5 (1.3–5.6)   | 1.08 (1.03–1.14) | 0.001   | 5.1 (2.5–7.7)   | 1.12 (1.06–1.19) | <0.001  |
| Men                                                                          | 3.9 (1.3–6.6)   | 1.08 (1.03–1.15) | 0.004   | 5.6 (2.4–8.7)   | 1.12 (1.05–1.20) | <0.001  |
| Women                                                                        | 3.5 (1.2–5.8)   | 1.09 (1.03–1.15) | 0.003   | 4.5 (1.7–7.2)   | 1.12 (1.04–1.19) | 0.001   |

<sup>a</sup> without C44 and C77–C79; SRD, standardized rate difference (most vs. least deprived quintile); SRR, standardized rate ratio (most vs. least deprived quintile); SII, Slope index of inequality; RII, relative index of inequality; CI, confidence interval. All measures are age-standardized according to the 2013 European Standard Population.
